# Supplementary figures and images for: A GFP-based genetic screen reveals mutations that disrupt the architecture of the zebrafish retinotectal projection
Source: Oxford University Press journal article supplement (doi:10.1242/dev.01861), 2005-06-02

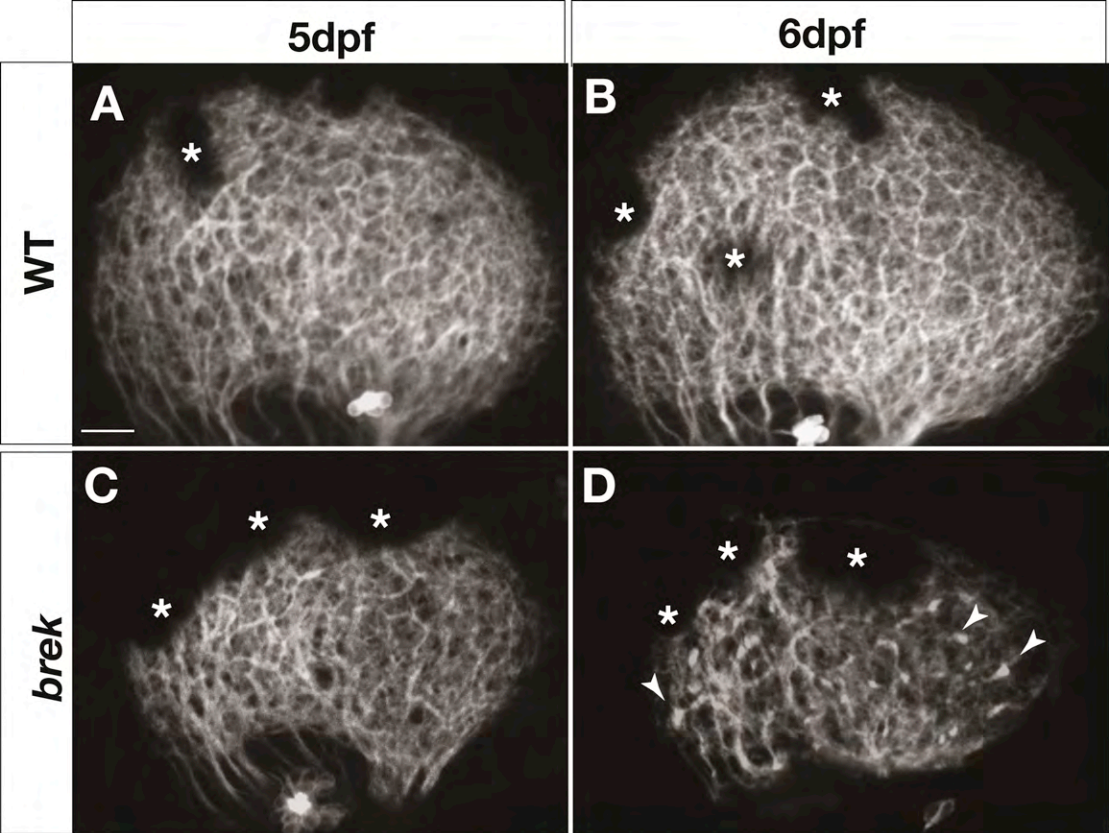

Supplement: dev01861-sup-figs1.pdf [file dev01861-sup-figs1.pdf]

*Brn3c:mGFP/zpr1*

**A**

**WT**

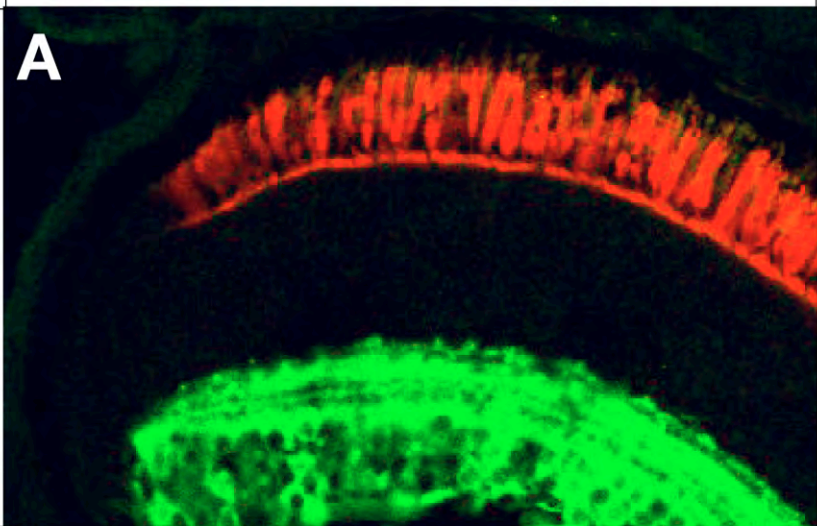

**B**

**coma**

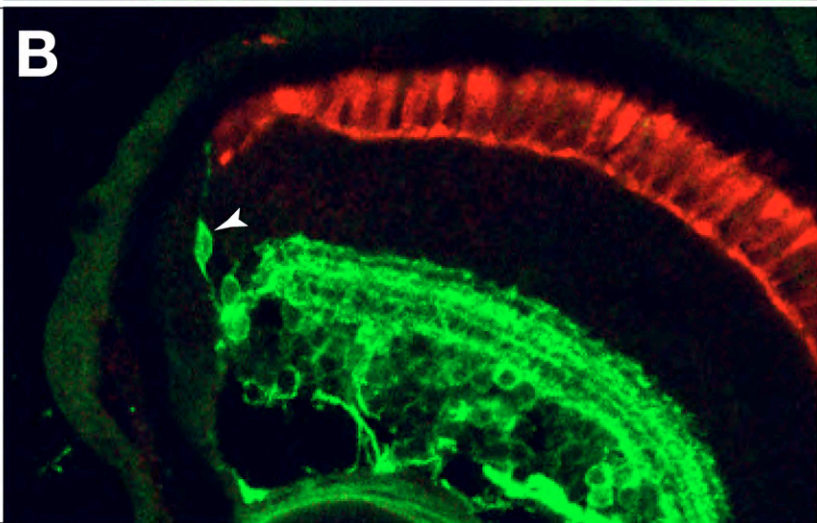

**C**

**beyo**

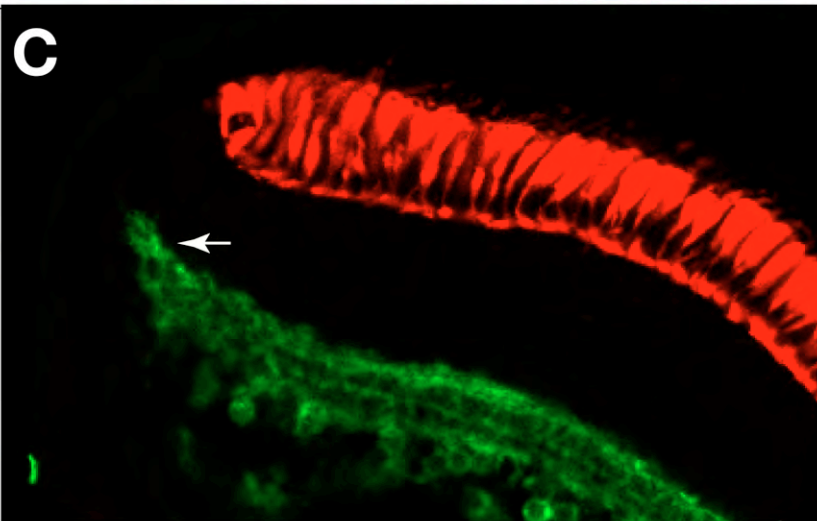

Supplement: dev01861-sup-figs2.pdf [file dev01861-sup-figs2.pdf]
